# Supplementary material
Source: MDPI journal article supplement (https://www.mdpi.com/2673-9976/4/1/99)
Supplement: s1 [file s1]

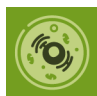

Supplementary material

# Phylogenetic Placement and Taxonomic Reinvestigation of Endemic and Endangered Plant Species: *Silene leucophylla* Boiss. and *Silene schimperiana* Boiss. (Caryophyllaceae)

Ahmed El-Banhawy <sup>1,\*</sup>, Faten Y. Ellmouni <sup>2,\*</sup>, Iman H. Nour <sup>3</sup>, Ahmed Faried <sup>4,5</sup>, Asmaa O. Olwey <sup>5</sup> and Ahmed ElKordy <sup>6</sup>

<sup>1</sup> Botany and Microbiology Department, Faculty of Science, Suez Canal University, 41522 Ismailia, Egypt

<sup>2</sup> Botany Department, Faculty of Science, Fayoum University, 63514 Fayoum, Egypt

<sup>3</sup> Botany and Microbiology Department, Faculty of Science, Alexandria University, 21511 Alexandria, Egypt; iman.nour@alexu.edu.eg

<sup>4</sup> Biology Department, College of Science and Arts, Sajir, Shaqra University, 11961 Shaqra, Saudi Arabia; afaried@su.edu.sa

<sup>5</sup> Botany and Microbiology Department, Faculty of Science, Assiut University, 71515 Assiut, Egypt; ahmedfaried55@aun.edu.eg (A.F.); asmaa\_olwey@science.aun.edu.eg (A.O.O.)

<sup>6</sup> Botany and Microbiology Department, Faculty of Science, Sohag University, 82524 Sohag, Egypt; aelkordy@science.sohag.edu.eg

\* Correspondence: ahmedbanhawwy@science.suez.edu.eg (A.E.-B.); fyl00@fayoum.edu.eg (F.Y.E.)

† Presented at the 1st International Electronic Conference on Plant Science, 1–15 December 2020; Available online: <https://iecps2020.sciforum.net/>.

**Table S1.** Qualitative characteristics of stem and leaf Abaxial leaf (AB) and Adaxial leaf (AD) characters of *Silene leucophylla* and *Silene schimperiana*.

| Characters                              | <i>Silene leucophylla</i> Boiss.    | <i>Silene schimperiana</i> Boiss.         |
|-----------------------------------------|-------------------------------------|-------------------------------------------|
| <b>Stem characters</b>                  |                                     |                                           |
| Surface                                 | Pubescent                           | Glabrous                                  |
| Epicuticular Wax                        | Thin layer                          | Irregular crustose platelets              |
| Trichomes                               | Present                             | Absent                                    |
| Trichomes Type                          | Unicellular, non-glandular          | Absent                                    |
| Trichome Surface                        | Densely pustulate                   | Absent                                    |
| Trichomes Length                        | 45–98 µm                            | Absent                                    |
| Trichomes Width                         | 13–23 µm                            | Absent                                    |
| Stomata Type                            | Anomocytic                          | Anomocytic                                |
| <b>Abaxial leaf (AB) characters</b>     |                                     |                                           |
| Epidermal Cell Shape                    | Irregular oblong to bone-shape      | Parallel tetra- to polygonal              |
| Anticlinal Walls                        | Sunken channeled irregularly curved | Sunken straight                           |
| The curvature of Outer Periclinal Walls | Convex                              | Slightly Convex                           |
| Fine Relief of the Cell Wall            | Highly ribbed                       | Irregular epicuticular crustose platelets |
| Trichomes Type                          | Unicellular, non-glandular          | Absent                                    |
| Trichome Surface                        | Densely irregular pustulate         | Absent                                    |
| Trichomes Length                        | 78–130 µm                           | Absent                                    |
| Trichomes Width                         | 18–20 µm                            | Absent                                    |
| Stomata Type                            | Diacytic                            | Diacytic                                  |
| Stomata Level                           | Raised                              | Sunken                                    |
| Guard Cell Surface                      | Smooth                              | Irregular epicuticular crustose platelets |
| Pore Shape                              | Elliptic slit                       | Linear slit                               |
| <b>Adaxial leaf (AD) characters</b>     |                                     |                                           |
| Epidermal Cell Shape                    | Irregular oblong to bone-shape      | Parallel penta- to polygonal              |
| Anticlinal Walls                        | Sunken channeled irregularly curved | Sunken straight                           |
| The curvature of Outer Periclinal Walls | Convex                              | Slightly Convex                           |
| Fine Relief of the Cell Wall            | Moderately ribbed                   | Irregular epicuticular crustose platelets |
| Trichomes Type                          | Unicellular, non-glandular          | Absent                                    |
| Trichome Surface                        | Densely irregular pustulate         | Absent                                    |
| Trichomes Length                        | 75–125 µm                           | Absent                                    |
| Trichomes Width                         | 16–25 µm                            | Absent                                    |
| Stomata Type                            | Diacytic                            | Diacytic                                  |
| Stomata Level                           | Raised                              | Sunken                                    |
| Guard Cell Surface                      | Smooth                              | Irregular epicuticular crustose platelets |
| Pore Shape                              | Elliptic slit                       | Elliptic + Linear slits                   |

**Table S1.** Quantitative characteristics of stem and leaf Abaxial leaf (AB) and Adaxial leaf (AD) characters of *Silene leucophylla* and *Silene schimperiana*.

| Characters                   | Abbreviations | Silene leucophylla |       |        |       |        |       |      | Silene schimperiana |       |        |        |        |        |       |
|------------------------------|---------------|--------------------|-------|--------|-------|--------|-------|------|---------------------|-------|--------|--------|--------|--------|-------|
|                              |               | Mean               | SD    | Media  | Min   | Max    | Rang  | SE   | Mean                | SD    | Media  | Min    | Max    | Range  | SE    |
| Stem characters              |               |                    |       |        |       |        |       |      |                     |       |        |        |        |        |       |
| Stomatal Pore Length         | SPL           | 10.57              | 2.5   | 10.09  | 7.67  | 14.4   | 6.73  | 1.12 | 13.55               | 2.81  | 13.32  | 10.85  | 16.47  | 5.62   | 1.63  |
| Stomatal Pore Width          | SPW           | 1.89               | 0.87  | 1.33   | 1.16  | 2.88   | 1.71  | 0.39 | 1.47                | 0.46  | 1.72   | 0.95   | 1.75   | 0.8    | 0.26  |
| Stomatal Pore Area           | SPA           | 14.19              | 7.09  | 12.33  | 7.38  | 25.1   | 17.72 | 3.17 | 14.71               | 8.04  | 18.75  | 5.45   | 19.93  | 14.48  | 4.64  |
| Stomatal Complex Length      | SCL           | 21.9               | 2.16  | 21.9   | 20.37 | 23.43  | 3.05  | 1.53 | 19.05               | 2.67  | 17.78  | 17     | 23.49  | 6.49   | 0.94  |
| Stomatal Complex Width       | SCW           | 5.66               | 1.59  | 5.66   | 4.53  | 6.78   | 2.25  | 1.13 | 6.21                | 1.11  | 6.02   | 4.65   | 7.97   | 3.32   | 0.39  |
| Stomatal Complex Area        | SCA           | 107.40             | 29.41 | 107.4  | 86.61 | 128.19 | 41.59 | 20.7 | 88.84               | 17.83 | 89.65  | 63.05  | 119.72 | 56.66  | 6.31  |
| Abaxial leaf (AB) characters |               |                    |       |        |       |        |       |      |                     |       |        |        |        |        |       |
| Stomatal Pore Length         | SPL.AB        | 9.34               | 1.36  | 8.89   | 8.41  | 11.74  | 3.33  | 0.61 | 15.33               | 1.25  | 15.67  | 13.6   | 17.15  | 3.55   | 0.47  |
| Stomatal Pore Width          | SPW.AB        | 1.82               | 0.5   | 1.84   | 1.03  | 2.33   | 1.3   | 0.22 | 1.72                | 0.66  | 1.49   | 1.06   | 2.62   | 1.56   | 0.25  |
| Stomatal Pore Area           | SPA.AB        | 11.79              | 5.11  | 13.92  | 5.36  | 17.38  | 12.02 | 2.29 | 15.26               | 5.66  | 13.76  | 9.36   | 23.84  | 14.48  | 2.14  |
| Stomatal Complex Length      | SCL.AB        | 15.18              | 2.61  | 14.28  | 11.84 | 18.19  | 6.35  | 0.87 | 22.14               | 1.8   | 22.56  | 19.19  | 23.69  | 4.5    | 0.81  |
| Stomatal Complex Width       | SCW.AB        | 5.37               | 0.6   | 5.6    | 4.51  | 6.13   | 1.63  | 0.2  | 8.55                | 1.25  | 8.31   | 7.06   | 10.51  | 3.45   | 0.56  |
| Stomatal Complex Area        | SCA.AB        | 61.42              | 8.56  | 63.79  | 46.44 | 74.64  | 28.21 | 2.85 | 151.82              | 21.4  | 149.01 | 125.33 | 185.13 | 59.8   | 9.57  |
| Number of Lobes              | NLP.AB        | 8.33               | 1.66  | 9      | 6     | 11     | 5     | 0.55 | 6.5                 | 1.07  | 6      | 5      | 8      | 3      | 0.38  |
| Epidermal Cell Length        | ECL.AB        | 34.74              | 7.71  | 35.96  | 23.51 | 46.04  | 22.53 | 2.57 | 47.57               | 11.36 | 47.18  | 30.52  | 61.4   | 30.88  | 4.01  |
| Epidermal Cell Width         | ECW.AB        | 16.09              | 3.97  | 16.87  | 8.73  | 21.95  | 13.22 | 1.32 | 52.39               | 10.4  | 53.69  | 37.85  | 63.79  | 25.94  | 3.68  |
| Subsidiary Cell Length       | SBL.AB        | 41.43              | 4.02  | 42.44  | 32.66 | 45.72  | 13.06 | 1.34 | 56.58               | 5.03  | 56.89  | 50.77  | 61.77  | 11     | 2.52  |
| Subsidiary Cell Width        | SBW.AB        | 24.25              | 4.24  | 23.31  | 18.13 | 30.58  | 12.45 | 1.41 | 45.01               | 8.12  | 45.35  | 36.43  | 52.92  | 16.49  | 4.06  |
| Subsidiary Cell Area         | SBA.AB        | 740.64             | 201.8 | 767.86 | 450.1 | 1049.2 | 599.1 | 67.2 | 2306.2              | 920.7 | 2328.1 | 1287.0 | 3281.8 | 1994.7 | 460.3 |
| Number of Stomata            | SCN.AB        | 10                 | 2.83  | 10     | 8     | 12     | 4     | 2    | 5                   | 1.41  | 5.5    | 3      | 6      | 3      | 0.71  |
| Number of Epidermal Cells    | NEC.AB        | 73.5               | 19.09 | 73.5   | 60    | 87     | 27    | 13.5 | 30.75               | 2.22  | 31     | 28     | 33     | 5      | 1.11  |
| Stomatal Index               | SI.AB         | 11.94              | 0.25  | 11.94  | 11.76 | 12.12  | 0.36  | 0.18 | 13.78               | 2.81  | 14.84  | 9.68   | 15.79  | 6.11   | 1.41  |
| Adaxial leaf (AD) characters |               |                    |       |        |       |        |       |      |                     |       |        |        |        |        |       |
| Stomatal Pore length         | SPL.AD        | 9.95               | 0.68  | 10.11  | 8.99  | 10.58  | 1.59  | 0.34 | 13.8                | 3.26  | 12.73  | 8.94   | 18.45  | 9.52   | 1.03  |
| Stomatal Pore width          | SPW.AD        | 1.67               | 0.42  | 1.75   | 1.15  | 2.03   | 0.88  | 0.21 | 2.29                | 0.62  | 2.14   | 1.67   | 3.58   | 1.91   | 0.2   |
| Stomatal Pore area           | SPA.AD        | 13.49              | 2.55  | 14     | 10.13 | 15.84  | 5.7   | 1.27 | 21.42               | 8.55  | 20.4   | 12.26  | 36.7   | 24.44  | 2.7   |
| Stomatal Complex length      | SCL.AD        | 16.32              | 1.4   | 16.38  | 14.29 | 18.71  | 4.42  | 0.39 | 20                  | 1.25  | 19.94  | 17.9   | 22.51  | 4.61   | 0.36  |

|                           |        |        |       |        |       |        |       |      |        |       |        |        |        |        |       |
|---------------------------|--------|--------|-------|--------|-------|--------|-------|------|--------|-------|--------|--------|--------|--------|-------|
| Stomatal Complex width    | SCW.AD | 5.35   | 0.77  | 5.19   | 3.6   | 6.77   | 3.17  | 0.21 | 9.53   | 1.98  | 9.37   | 6.19   | 13.33  | 7.14   | 0.57  |
| Stomatal Complex area     | SCA.AD | 64.85  | 9.97  | 60.12  | 54.65 | 81.03  | 26.38 | 2.77 | 152.3  | 37.92 | 147.69 | 102.2  | 253.5  | 151.3  | 10.95 |
| Number of lobes           | NLP.AD | 8.55   | 1.29  | 8      | 7     | 11     | 4     | 0.39 | 7.07   | 1.28  | 7      | 5      | 10     | 5      | 0.33  |
| Epidermal Cell length     | ECL.AD | 43.2   | 5.94  | 44.19  | 31.16 | 52.41  | 21.25 | 1.79 | 57.61  | 15.76 | 57.53  | 35.48  | 91.04  | 55.56  | 4.07  |
| Epidermal Cell width      | ECW.AD | 19.6   | 5.45  | 18.25  | 12.79 | 26.97  | 14.19 | 1.64 | 48.83  | 16.59 | 43.97  | 32.47  | 80.59  | 48.12  | 4.28  |
| Subsidiary Cell Length    | SBL.AD | 47.76  | 5.25  | 47.76  | 38.05 | 58.57  | 20.52 | 1.52 | 76.92  | 18.43 | 71.6   | 54     | 117.97 | 63.97  | 4.61  |
| Subsidiary Cell Width     | SBW.AD | 28.14  | 4.19  | 28.18  | 21.69 | 35.43  | 13.75 | 1.21 | 48.82  | 10.38 | 47.58  | 32.69  | 62.67  | 29.97  | 2.59  |
| Subsidiary Cell Area      | SBA.AD | 1049.0 | 167.8 | 1074.5 | 740.8 | 1304.8 | 563.9 | 48.4 | 2863.3 | 663.9 | 2778.2 | 1782.3 | 4048.7 | 2266.4 | 165.9 |
| Number of Stomata         | SCN.AD | 8      | 1     | 8      | 7     | 9      | 2     | 0.58 | 4.75   | 0.96  | 4.5    | 4      | 6      | 2      | 0.48  |
| Number of Epidermal Cells | NEC.AD | 54.67  | 5.69  | 53     | 50    | 61     | 11    | 3.28 | 27     | 3.27  | 27     | 23     | 31     | 8      | 1.63  |
| Stomatal Index            | SI.AD  | 12.89  | 2.49  | 13.11  | 10.29 | 15.25  | 4.96  | 1.44 | 15.1   | 3.76  | 13.4   | 12.9   | 20.69  | 7.79   | 1.88  |
